# Supplementary material for: Community-wide analysis of microbial genome sequence signatures
Source: Springer Nature journal article supplement (doi:10.1186/gb-2009-10-8-r85), 2009-08-21

**Additional data file 1.** Evaluation of genome sequence fragment clustering based on fixed point kernel densities. Shown is the ESOM map presented in Fig. 3, without the U-matrix background displayed. Data points of known identity (from assembly information) are enlarged and colored; others are unassigned. Contour lines are delineated so that 90% of the data points for each genome are included within the bin boundaries.

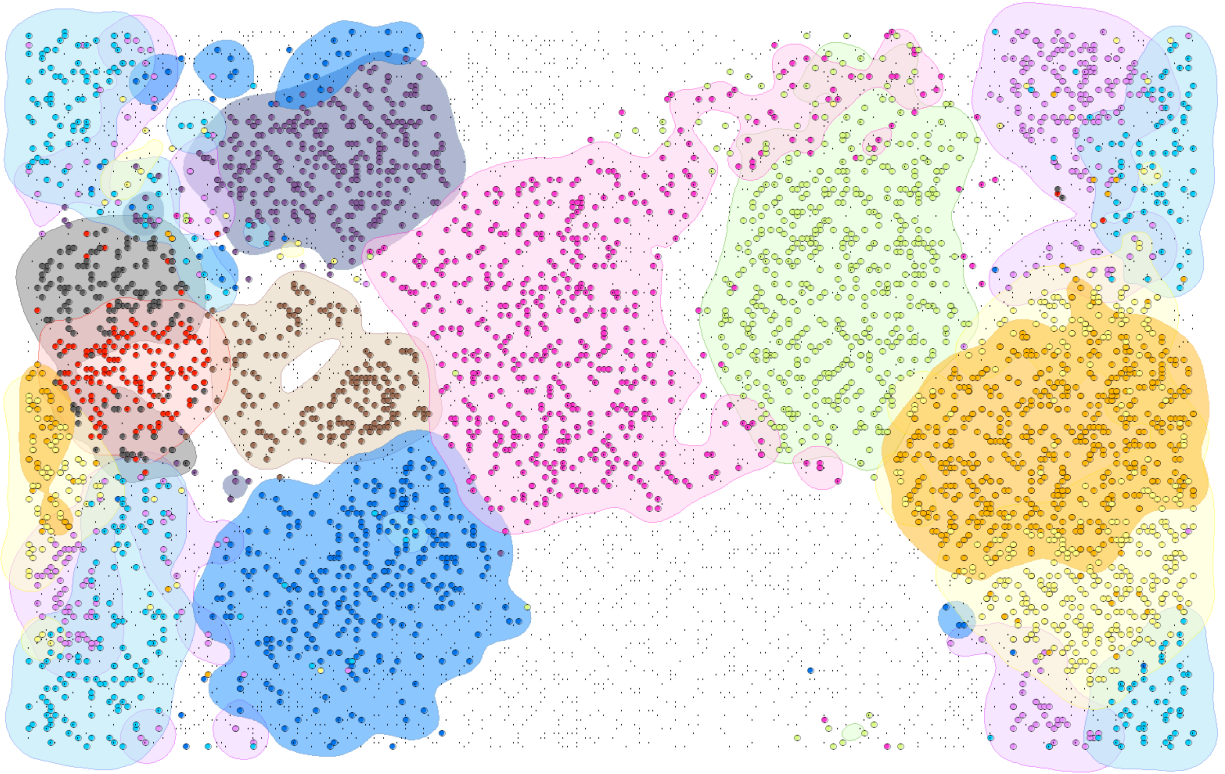

Supplement: 13059_2009_2235_MOESM1_ESM.pdf [file 13059_2009_2235_MOESM1_ESM.pdf]
