# Supplementary material for: Community-wide analysis of microbial genome sequence signatures
Source: Springer Nature journal article supplement (doi:10.1186/gb-2009-10-8-r85), 2009-08-21

**Additional data file 3.** Binning accuracy for partial (subsamped) composite genomes. Binning and calculation of accuracy were done as described in additional file 4 with the exception that unassigned sequences were not included in the ESOM. Genomes were broken into 5-kb fragments, then this pool was randomly sampled to obtain the indicated % genome.

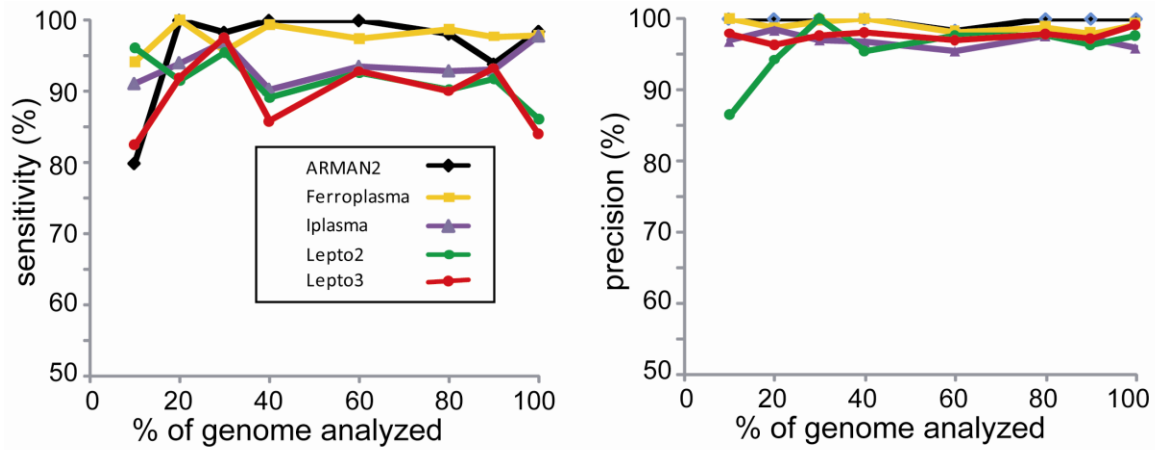

Supplement: 13059_2009_2235_MOESM3_ESM.pdf [file 13059_2009_2235_MOESM3_ESM.pdf]
