# Supplementary material for: Community-wide analysis of microbial genome sequence signatures
Source: Springer Nature journal article supplement (doi:10.1186/gb-2009-10-8-r85), 2009-08-21

**Additional data file 4.** Average genome-wide frequency of each tetranucleotide.

Tetranucleotides (columns) are sorted from left to right based on the number of G+C per tetranucleotide as indicated at top. Palindromic tetranucleotides are marked with black circles, and those that effectively distinguish closely related members of the *Thermoplasmatales* with the same %GC (E-plasma, G-plasma, *Ferroplasma* types I and II) are indicated with stars: TATA, ATAT, GATC. (A) All Iron Mountain AMD bacterial and archaeal genomes, listed from high G+C content (top) to low (bottom). (B) Archaeal and bacterial genomes for which viral genomes have been reconstructed [12]. The tetranucleotide frequencies of the hosts are shown adjacent to their viruses.

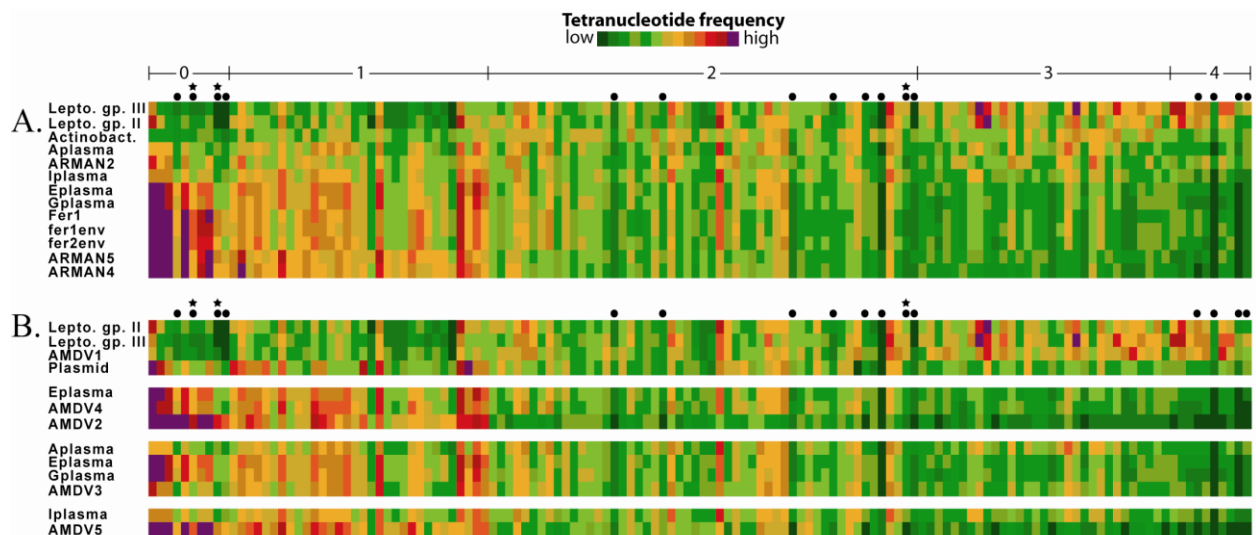

Supplement: 13059_2009_2235_MOESM4_ESM.pdf [file 13059_2009_2235_MOESM4_ESM.pdf]
