# Supplementary material for: Community-wide analysis of microbial genome sequence signatures
Source: Springer Nature journal article supplement (doi:10.1186/gb-2009-10-8-r85), 2009-08-21

**Additional data file 5.** ESOM of assembled genomes based on amino acid composition (a), codon composition (b), and tetranucleotide frequency (c). Color schemes are as in Fig. 2.

A. Amino acids:

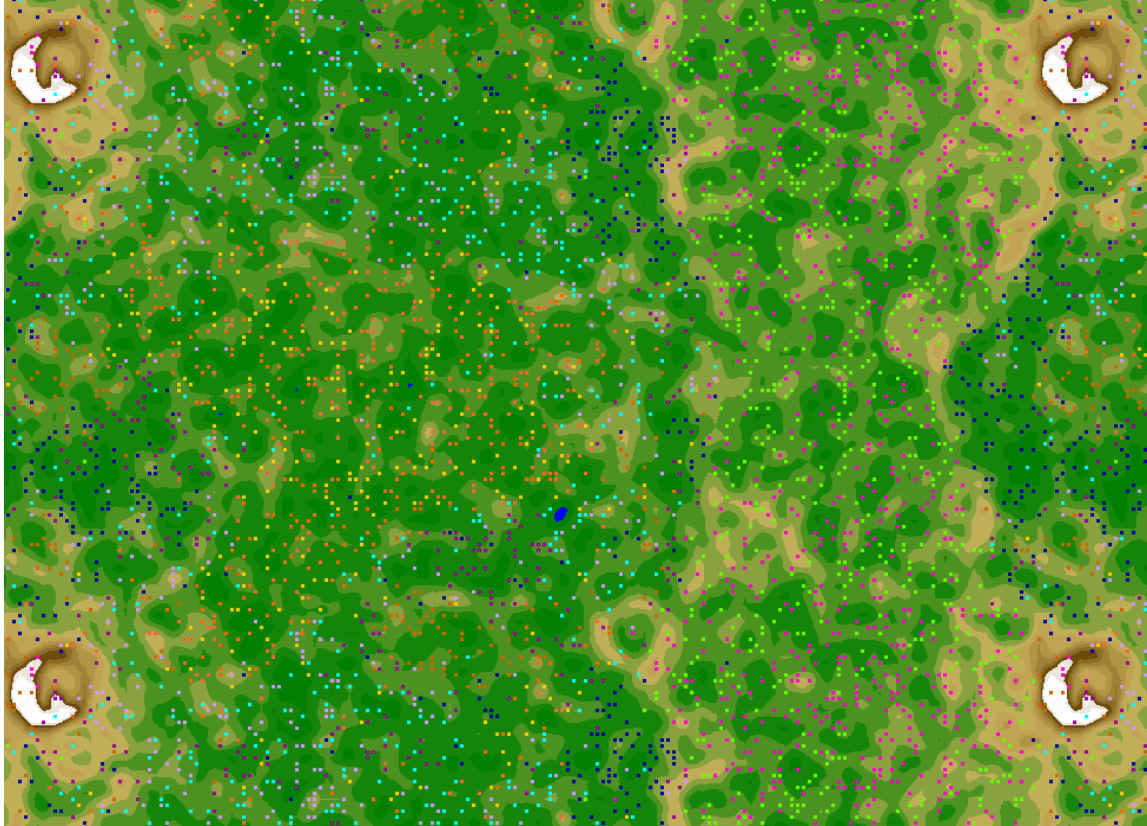

B. Codons:

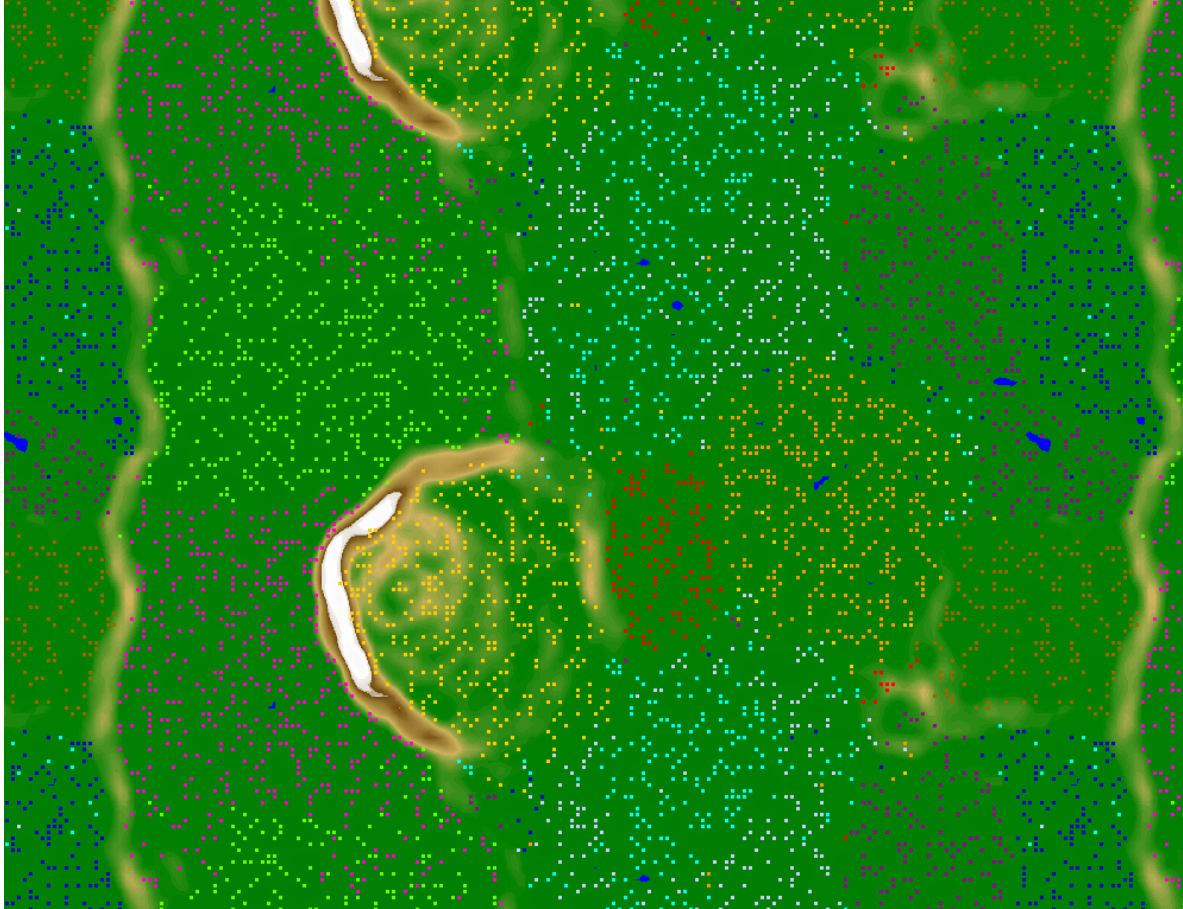

C. Tetranucleotides:

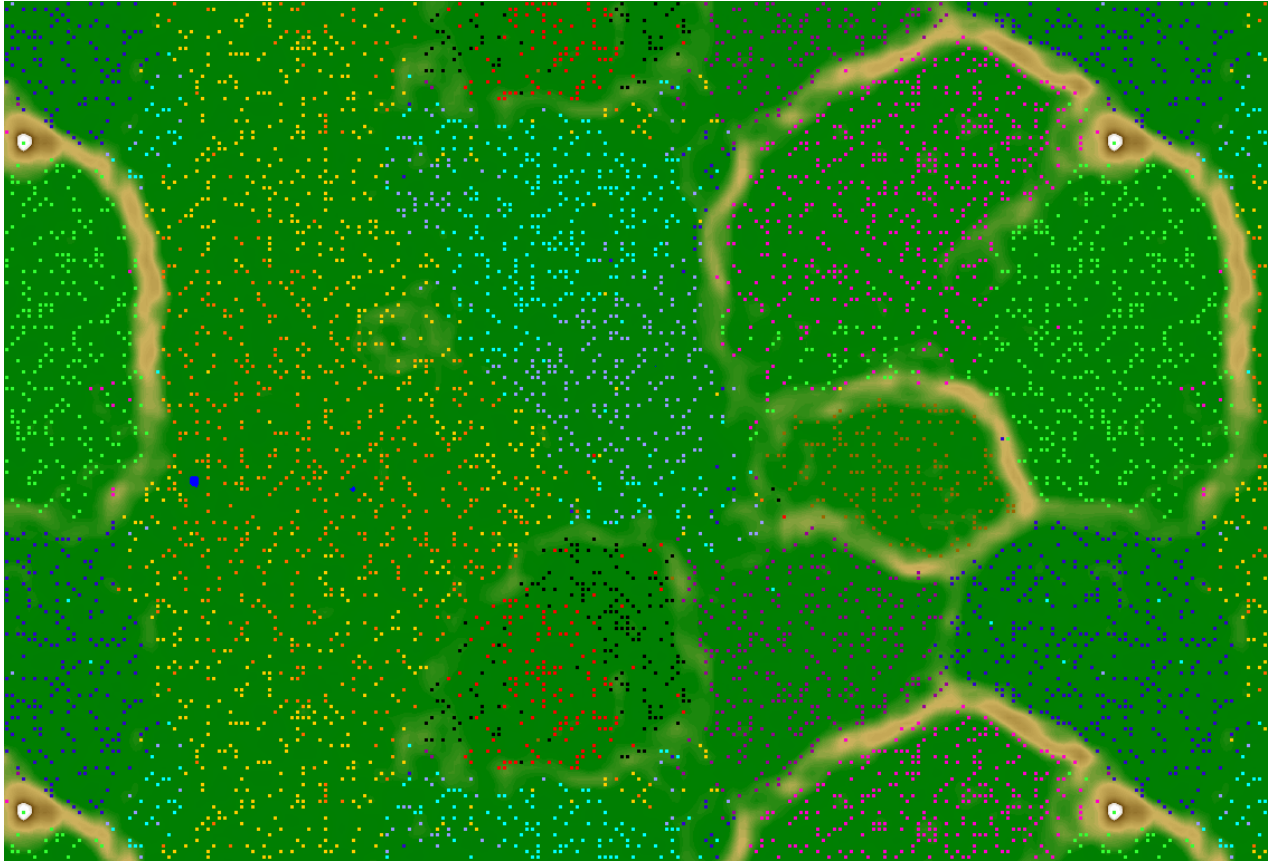

Supplement: 13059_2009_2235_MOESM5_ESM.pdf [file 13059_2009_2235_MOESM5_ESM.pdf]
