# Supplementary material for: Community-wide analysis of microbial genome sequence signatures
Source: Springer Nature journal article supplement (doi:10.1186/gb-2009-10-8-r85), 2009-08-21

**Additional data file 6.** The observed difference in frequency of each tetranucleotide between pairs of genomes correlates with the predicted difference based on codon composition. (A) A-plasma versus E-plasma; (B) Eplasma versus *Ferroplasma acidarmanus*; (C) G-plasma versus E-plasma; (D) *Leptosprillum* sp. group II versus group III.

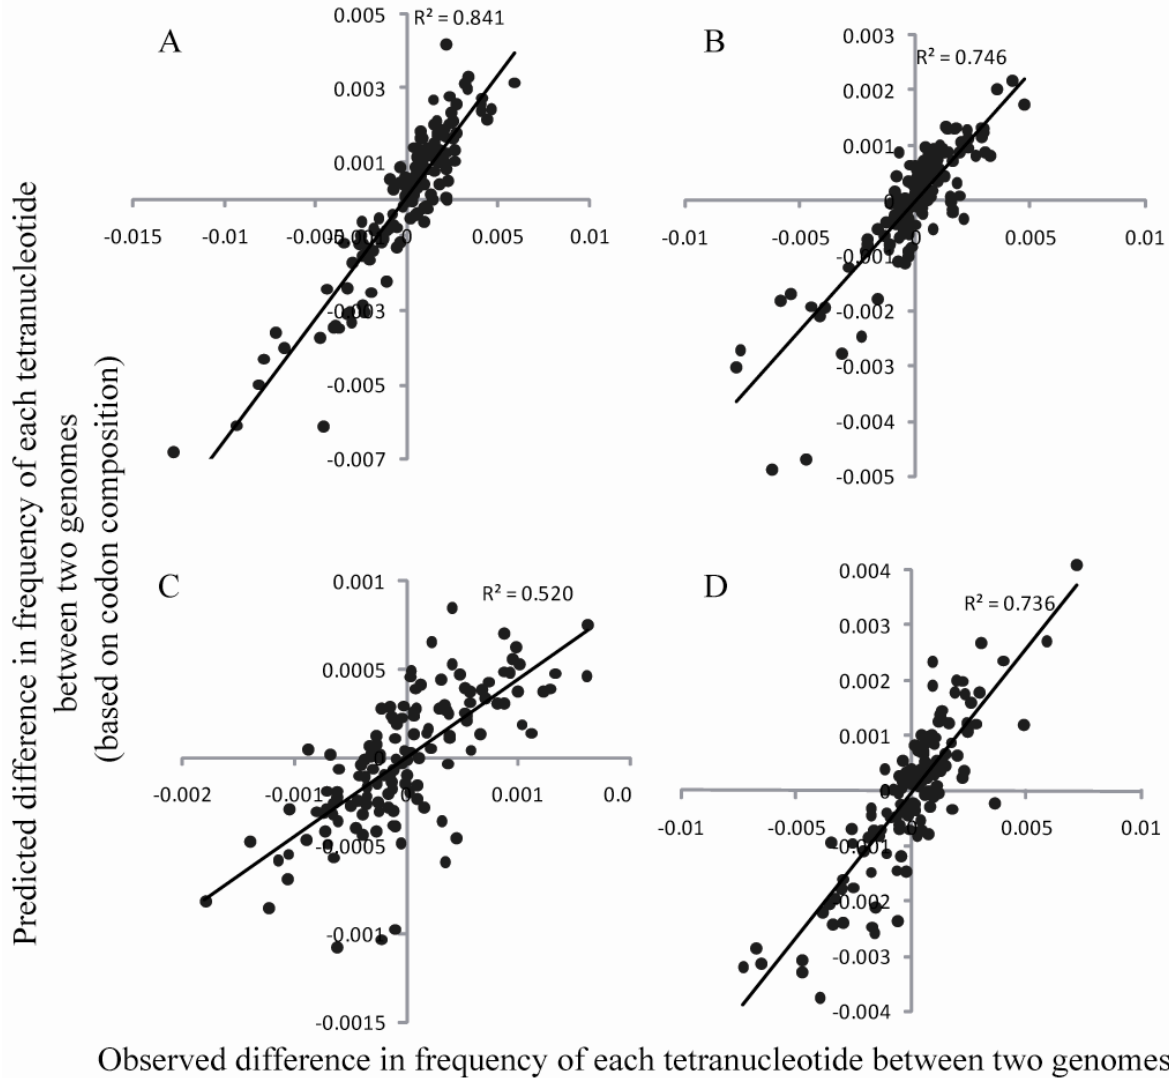

Supplement: 13059_2009_2235_MOESM6_ESM.pdf [file 13059_2009_2235_MOESM6_ESM.pdf]
