# Supplementary material for: Community-wide analysis of microbial genome sequence signatures
Source: Springer Nature journal article supplement (doi:10.1186/gb-2009-10-8-r85), 2009-08-21

**Additional data file 7.** Binning of coding and noncoding regions of assembled genomes. Noncoding regions are shown in bold with color corresponding to coding regions.

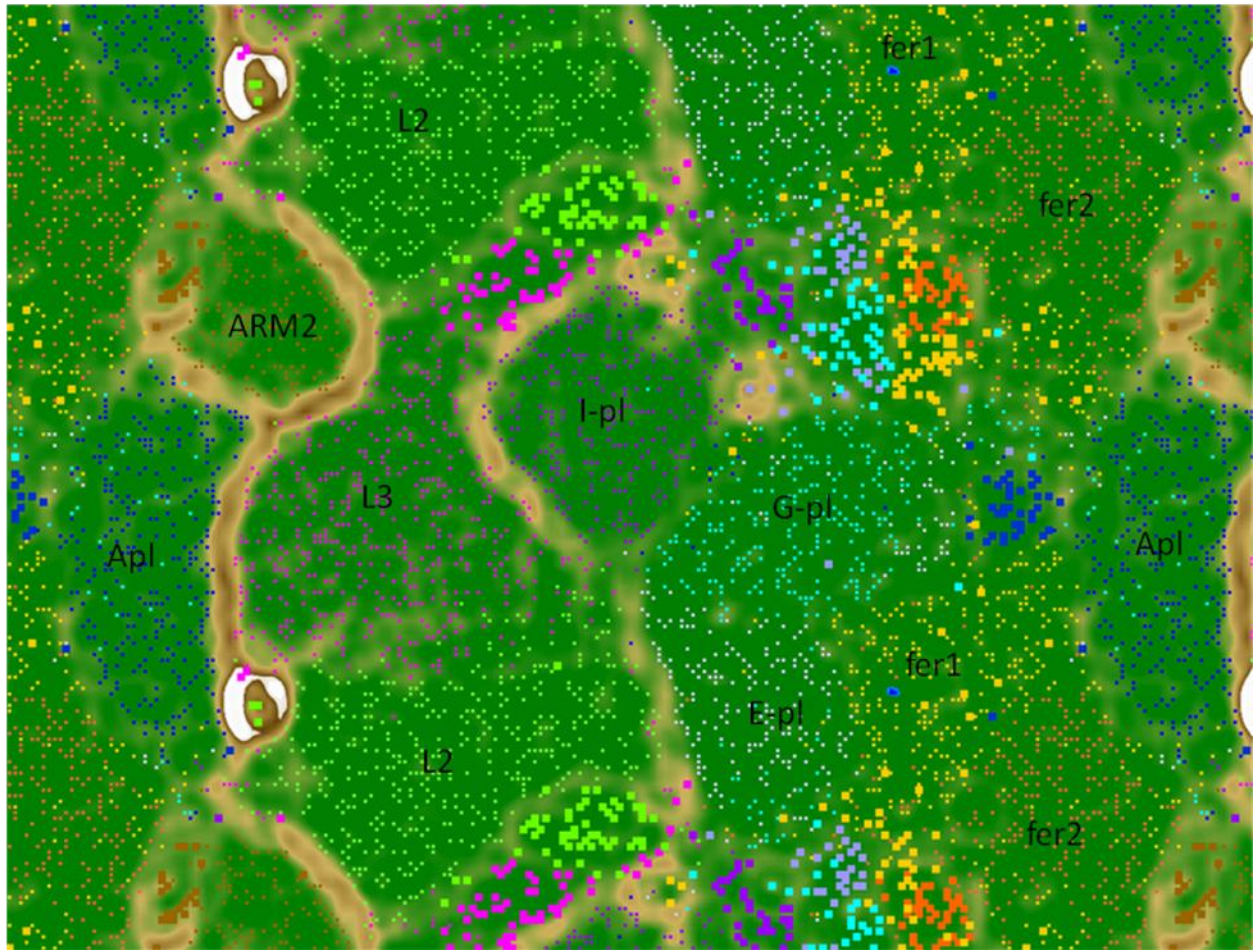

Supplement: 13059_2009_2235_MOESM7_ESM.pdf [file 13059_2009_2235_MOESM7_ESM.pdf]
