# Supplementary material for: Community-wide analysis of microbial genome sequence signatures
Source: Springer Nature journal article supplement (doi:10.1186/gb-2009-10-8-r85), 2009-08-21
Supplement: 13059_2009_2235_MOESM8_ESM.pdf [file 13059_2009_2235_MOESM8_ESM.pdf]

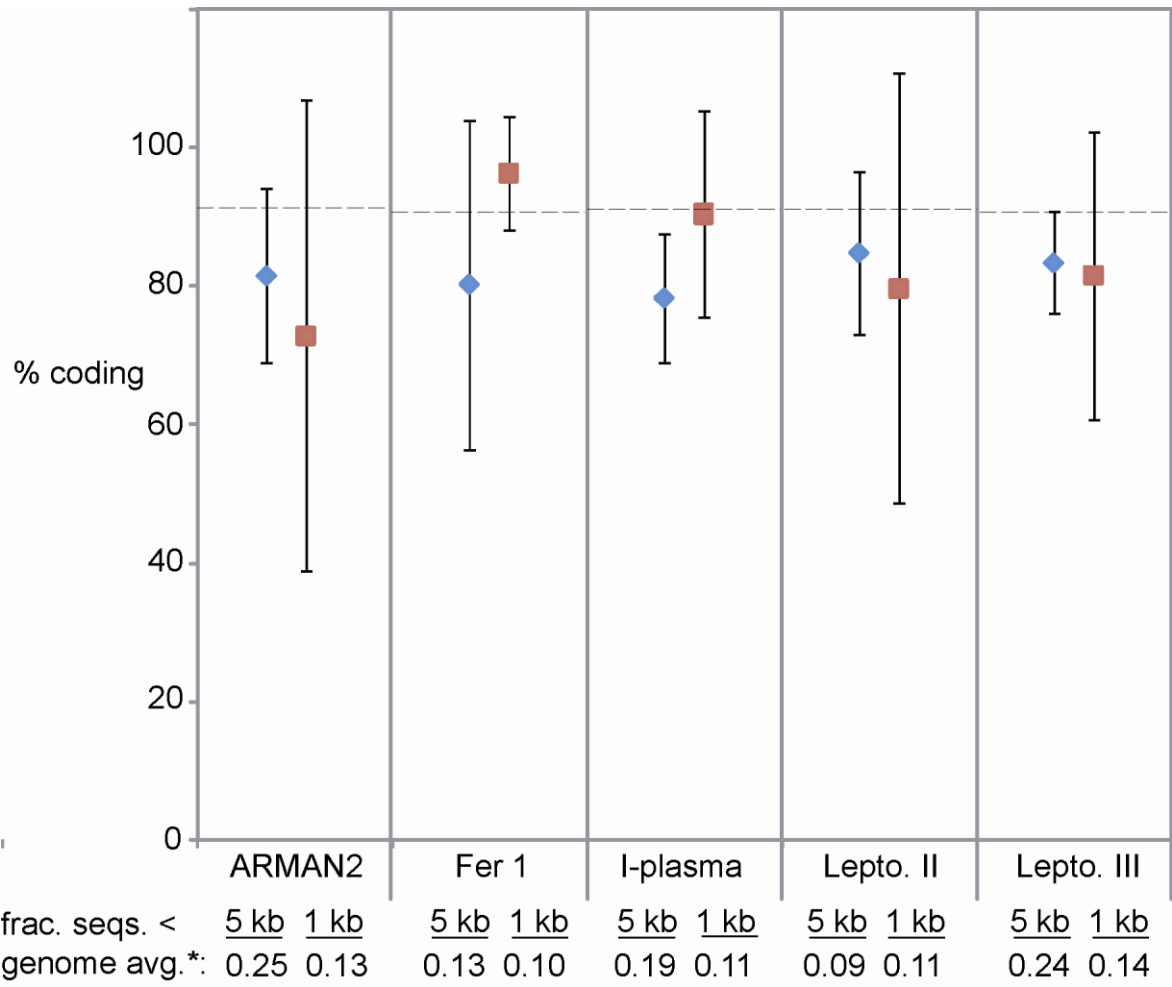

**Additional data file 8.** Percentage of sequence encoding genes on incorrectly binned fragments of 5 kb (blue) and 1 kb (red) length. Error bars represent one standard deviation. Dotted line indicates genome-wide average % of sequence coding for genes. \* Frac. seqs. < genome avg. is the fraction of incorrectly binned sequences with coding % less than one standard deviation below the genome average.
