# Supplementary material for: Community-wide analysis of microbial genome sequence signatures
Source: Springer Nature journal article supplement (doi:10.1186/gb-2009-10-8-r85), 2009-08-21

**Additional data file 9.** ESOM with *Leptospirillum* group II genes coding for highly expressed proteins (black) or proteins enriched in the extracellular fraction (white) analyzed as separate fractions from the rest of the genome (light green). The one black data point that clusters in the *Leptospirillum* group II/III unresolved region contains the following genes:

| Gene                               | Annotation                            |
|------------------------------------|---------------------------------------|
| UBA_LeptoII_Scaffold_8692_GENE_84  | Ribosomal protein L17                 |
| UBA_LeptoII_Scaffold_8692_GENE_93  | Ribosomal protein L15                 |
| UBA_LeptoII_Scaffold_8692_GENE_106 | Ribosomal protein L22                 |
| UBA_LeptoII_Scaffold_8692_GENE_109 | Ribosomal protein L23                 |
| UBA_LeptoII_Scaffold_8692_GENE_112 | Ribosomal protein S10                 |
| UBA_LeptoII_Scaffold_8692_GENE_113 | Translation elongation factor Tu      |
| UBA_LeptoII_Scaffold_8692_GENE_115 | Ribosomal protein S7                  |
| UBA_LeptoII_Scaffold_8692_GENE_121 | Ribosomal protein L10                 |
| UBA_LeptoII_Scaffold_8692_GENE_122 | Ribosomal protein L1                  |
| UBA_LeptoII_Scaffold_8692_GENE_124 | Transcription antitermination protein |
| UBA_LeptoII_Scaffold_8692_GENE_126 | Translation elongation factor Tu      |
| UBA_LeptoII_Scaffold_8692_GENE_142 | Ribosomal protein L25                 |

The average amino acid identity of these proteins between *Leptospirillum* groups II and III (67 +/- 14%) is not significantly different than the genome average (61 +/- 20%), therefore the difference in genome signature likely reflects unique codon usage due to translational selection.

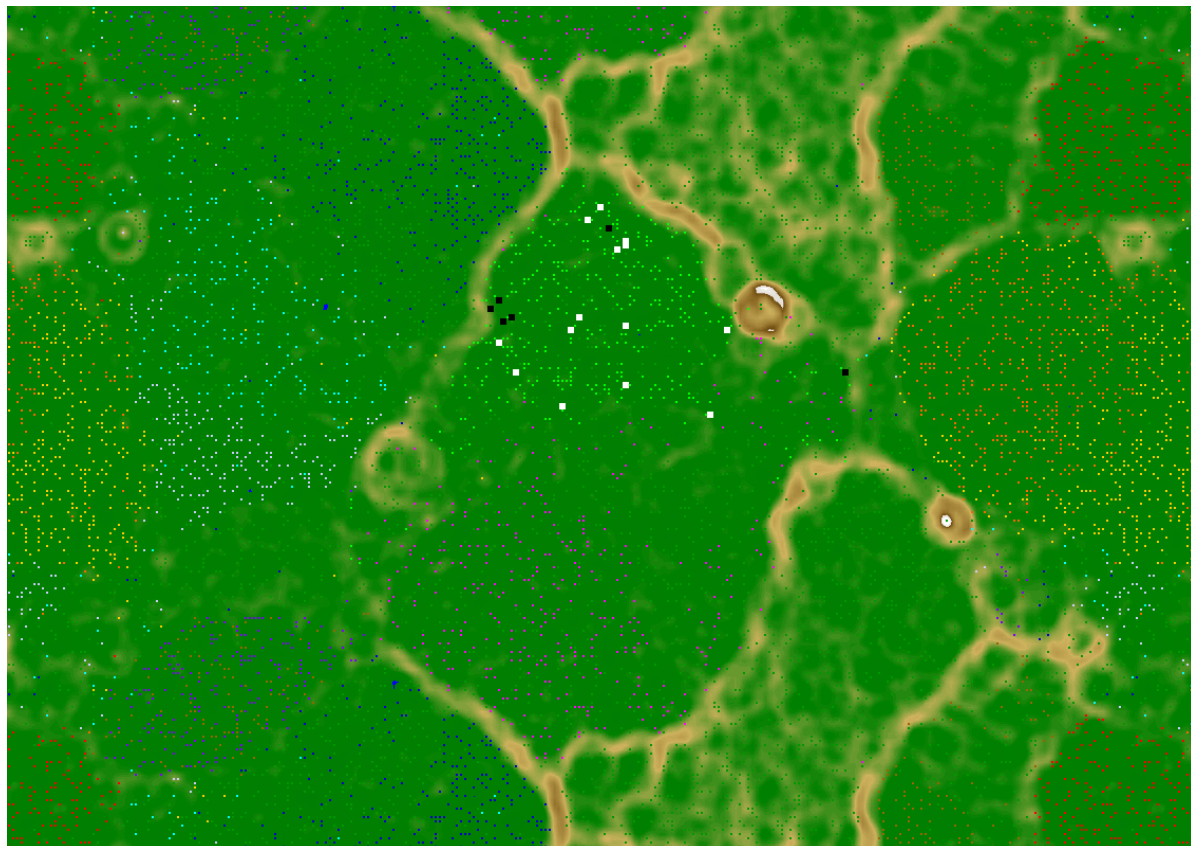

Supplement: 13059_2009_2235_MOESM9_ESM.pdf [file 13059_2009_2235_MOESM9_ESM.pdf]
