# Supplementary material for: Community-wide analysis of microbial genome sequence signatures
Source: Springer Nature journal article supplement (doi:10.1186/gb-2009-10-8-r85), 2009-08-21

**Additional data file 10.** Schematic of processes and factors influencing genome signature. Those inferred to be critical for distinguishing closely-related organisms in the AMD biofilm community are highlighted in red.

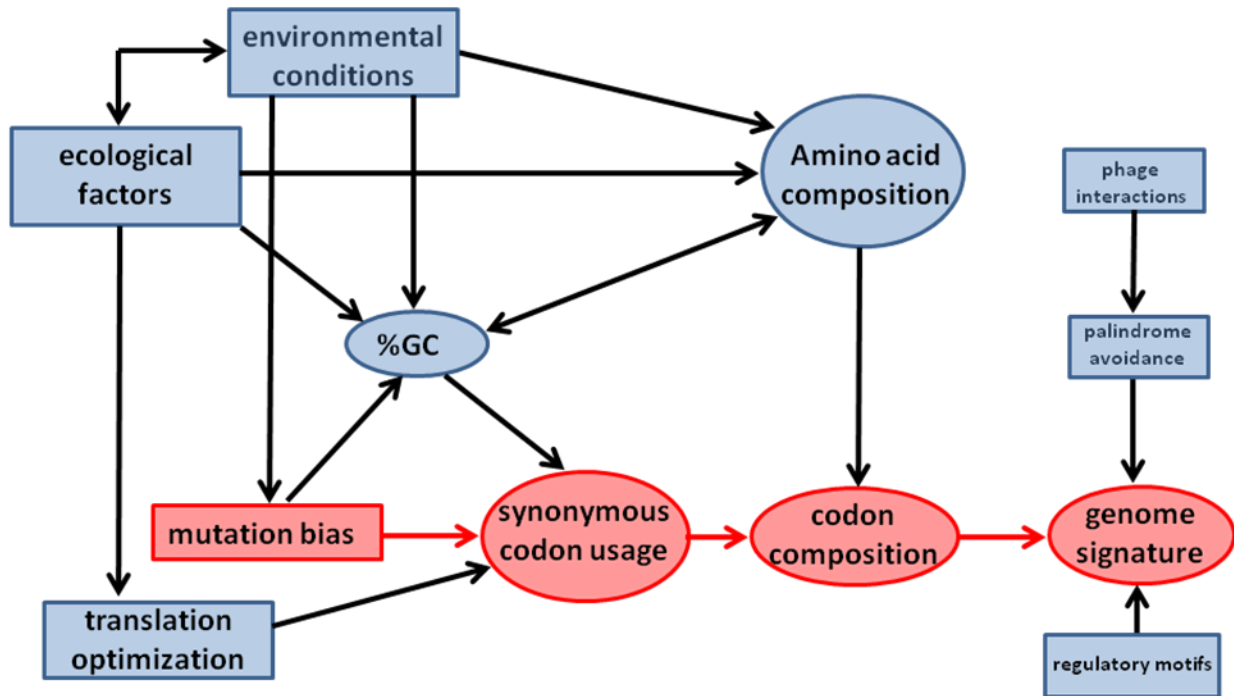

Supplement: 13059_2009_2235_MOESM10_ESM.pdf [file 13059_2009_2235_MOESM10_ESM.pdf]
