# Supplementary material for: Community-wide analysis of microbial genome sequence signatures
Source: Springer Nature journal article supplement (doi:10.1186/gb-2009-10-8-r85), 2009-08-21

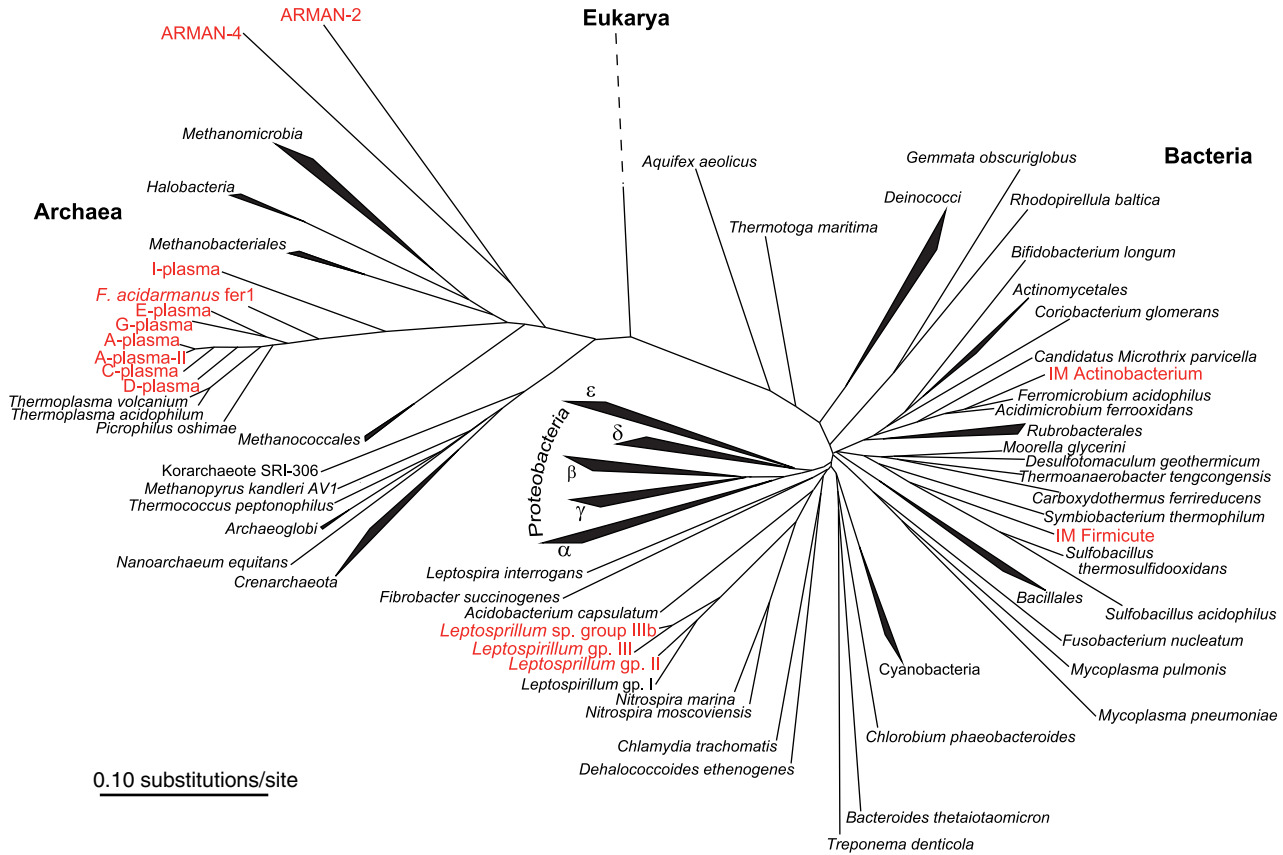

Supplement: 13059_2009_2235_MOESM12_ESM.pdf [file 13059_2009_2235_MOESM12_ESM.pdf]
